# Supplementary material
Source: ML conference proceedings conference paper supplement (https://proceedings.mlr.press/v80/helfrich18a.html)
Supplement: Supplementary file [file helfrich18a-supp.pdf]

---

## Orthogonal Recurrent Neural Networks with Scaled Cayley Transform

---

### Supplemental Material: Proof of Theorem 3.2

For completeness, we restate and prove Theorem 3.2.

**Theorem 3.2** *Let  $L = L(W) : \mathbb{R}^{n \times n} \rightarrow \mathbb{R}$  be some differentiable loss function for an RNN with the recurrent weight matrix  $W$ . Let  $W = W(A) := (I + A)^{-1}(I - A)D$  where  $A \in \mathbb{R}^{n \times n}$  is skew-symmetric and  $D \in \mathbb{R}^{n \times n}$  is a fixed diagonal matrix consisting of -1 and 1 entries. Then the gradient of  $L = L(W(A))$  with respect to  $A$  is*

$$\frac{\partial L}{\partial A} = V^T - V \quad (1)$$

where  $V := (I + A)^{-T} \frac{\partial L}{\partial W} (D + W^T)$ ,  $\frac{\partial L}{\partial A} = \left[ \frac{\partial L}{\partial A_{i,j}} \right] \in \mathbb{R}^{n \times n}$ , and  $\frac{\partial L}{\partial W} = \left[ \frac{\partial L}{\partial W_{i,j}} \right] \in \mathbb{R}^{n \times n}$

**Proof:** Let  $Z := (I + A)^{-1}(I - A)$ . We consider the  $(i, j)$  entry of  $\frac{\partial L}{\partial A}$ . Taking the derivative with respect to  $A_{i,j}$  where  $i \neq j$  we obtain:

$$\begin{aligned} \frac{\partial L}{\partial A_{i,j}} &= \sum_{k,l=1}^n \frac{\partial L}{\partial W_{k,l}} \frac{\partial W_{k,l}}{\partial A_{i,j}} = \sum_{k,l=1}^n \frac{\partial L}{\partial W_{k,l}} D_{l,l} \frac{\partial Z_{k,l}}{\partial A_{i,j}} \\ &= \text{tr} \left[ \left( \frac{\partial L}{\partial W} D \right)^T \frac{\partial Z}{\partial A_{i,j}} \right] \end{aligned}$$

Using the identity  $(I + A)Z = I - A$  and taking the derivative with respect to  $A_{i,j}$  to both sides we obtain:

$$\frac{\partial Z}{\partial A_{i,j}} + \frac{\partial A}{\partial A_{i,j}} Z + A \frac{\partial Z}{\partial A_{i,j}} = -\frac{\partial A}{\partial A_{i,j}}$$

and rearranging we get:

$$\frac{\partial Z}{\partial A_{i,j}} = -(I + A)^{-1} \left( \frac{\partial A}{\partial A_{i,j}} + \frac{\partial A}{\partial A_{i,j}} Z \right)$$

Let  $E_{i,j}$  denote the matrix whose  $(i, j)$  entry is 1 with all others being 0. Since  $A$  is skew-symmetric, we have  $\frac{\partial A}{\partial A_{i,j}} = E_{i,j} - E_{j,i}$ . Combining everything, we have:

$$\begin{aligned} \frac{\partial L}{\partial A_{i,j}} &= -\text{tr} \left[ \left( \frac{\partial L}{\partial W} D \right)^T (I + A)^{-1} (E_{i,j} - E_{j,i} + E_{i,j}Z - E_{j,i}Z) \right] \\ &= -\text{tr} \left[ \left( \frac{\partial L}{\partial W} D \right)^T (I + A)^{-1} E_{i,j} \right] \\ &\quad + \text{tr} \left[ \left( \frac{\partial L}{\partial W} D \right)^T (I + A)^{-1} E_{j,i} \right] \\ &\quad - \text{tr} \left[ \left( \frac{\partial L}{\partial W} D \right)^T (I + A)^{-1} E_{i,j} Z \right] \\ &\quad + \text{tr} \left[ \left( \frac{\partial L}{\partial W} D \right)^T (I + A)^{-1} E_{j,i} Z \right] \\ &= - \left[ \left( \left( \frac{\partial L}{\partial W} D \right)^T (I + A)^{-1} \right)^T \right]_{i,j} \\ &\quad + \left[ \left( \frac{\partial L}{\partial W} D \right)^T (I + A)^{-1} \right]_{i,j} \\ &\quad - \left[ \left( \left( \frac{\partial L}{\partial W} D \right)^T (I + A)^{-1} \right)^T Z^T \right]_{i,j} \\ &\quad + \left[ Z \left( \frac{\partial L}{\partial W} D \right)^T (I + A)^{-1} \right]_{i,j} \\ &= \left[ (I + Z) \left( \frac{\partial L}{\partial W} D \right)^T (I + A)^{-1} \right]_{i,j} \\ &\quad - \left[ \left( \left( \frac{\partial L}{\partial W} D \right)^T (I + A)^{-1} \right)^T (I + Z^T) \right]_{i,j} \\ &= \left[ (D + W) \left( \frac{\partial L}{\partial W} \right)^T (I + A)^{-1} \right]_{i,j} \\ &\quad - \left[ (I + A)^{-T} \frac{\partial L}{\partial W} (D + W^T) \right]_{i,j} \end{aligned}$$

Using the above formulation,  $\frac{\partial L}{\partial A_{j,j}} = 0$  and  $\frac{\partial L}{\partial A_{i,j}} = -\frac{\partial L}{\partial A_{j,i}}$  so that  $\frac{\partial L}{\partial A}$  is a skew-symmetric matrix. Finally, by the definition of  $V$  we get the desired result. ■
